# Supplementary material for: Elucidating the impact of A-site cation change on photocatalytic H2 and O2 evolution activities of perovskite-type LnTaON2 (Ln = La and Pr)
Source: Royal Society of Chemistry journal article supplement (doi:10.1039/c7cp03714g), 2017-01-01
Supplement: c7cp03714g1.pdf [file c7cp03714g1.pdf]

# Electronic Supplementary Information (ESI)

Elucidating the Impact of *A*-Site Cation Change on

Photocatalytic H<sub>2</sub> and O<sub>2</sub> Evolution Activities of

Perovskite-Type  $LnTaON_2$  ( $Ln = La$  and  $Pr$ ) †

Mirabbos Hojamberdiev<sup>1,2</sup>, Maged F. Bekheet<sup>3</sup>, Judy N. Hart<sup>4</sup>, Junie Jhon M. Vequizo<sup>5</sup>, Akira Yamakata<sup>5</sup>, Kunio Yubuta<sup>6</sup>, Aleksander Gurlo<sup>3</sup>, Masashi Hasegawa<sup>1</sup>, Kazunari Domen<sup>7</sup>, and Katsuya Teshima<sup>2,8,\*</sup>

<sup>1</sup>*Department of Materials Physics, Nagoya University, Furo-cho, Chikusa-ku, Nagoya 464-8603, Japan*

<sup>2</sup>*Department of Environmental Science and Technology, Faculty of Engineering, Shinshu University, 4-17-1 Wakasato, Nagano 380-8553, Japan*

<sup>3</sup>*Fachgebiet Keramische Werkstoffe / Chair of Advanced Ceramic Materials, Institut für Werkstoffwissenschaften und -technologien, Technische Universität Berlin, Hardenbergstraße 40, 10623 Berlin, Germany*

<sup>4</sup>*School of Materials Science and Engineering, UNSW Sydney, Sydney 2052, Australia*

<sup>5</sup>*Graduate School of Engineering, Toyota Technological Institute, 2-12-1 Hisakata, Tempaku, Nagoya 468-8511, Japan*

<sup>6</sup>*Institute for Materials Research, Tohoku University, 2-1-1 Katahira, Aoba-ku, Sendai 980-8577, Japan*

<sup>7</sup>*Department of Chemical System Engineering, School of Engineering, The University of Tokyo, 7-3-1 Hongo, Bunkyo-ku, Tokyo 113-8656, Japan*

<sup>8</sup>*Center for Energy and Environmental Science, Shinshu University, 4-17-1 Wakasato, Nagano 380-8553, Japan*

---

\*Corresponding author.

Phone: +81-26-269-5541. Fax: +81-26-269-5550. E-mail: teshima@shinshu-u.ac.jp

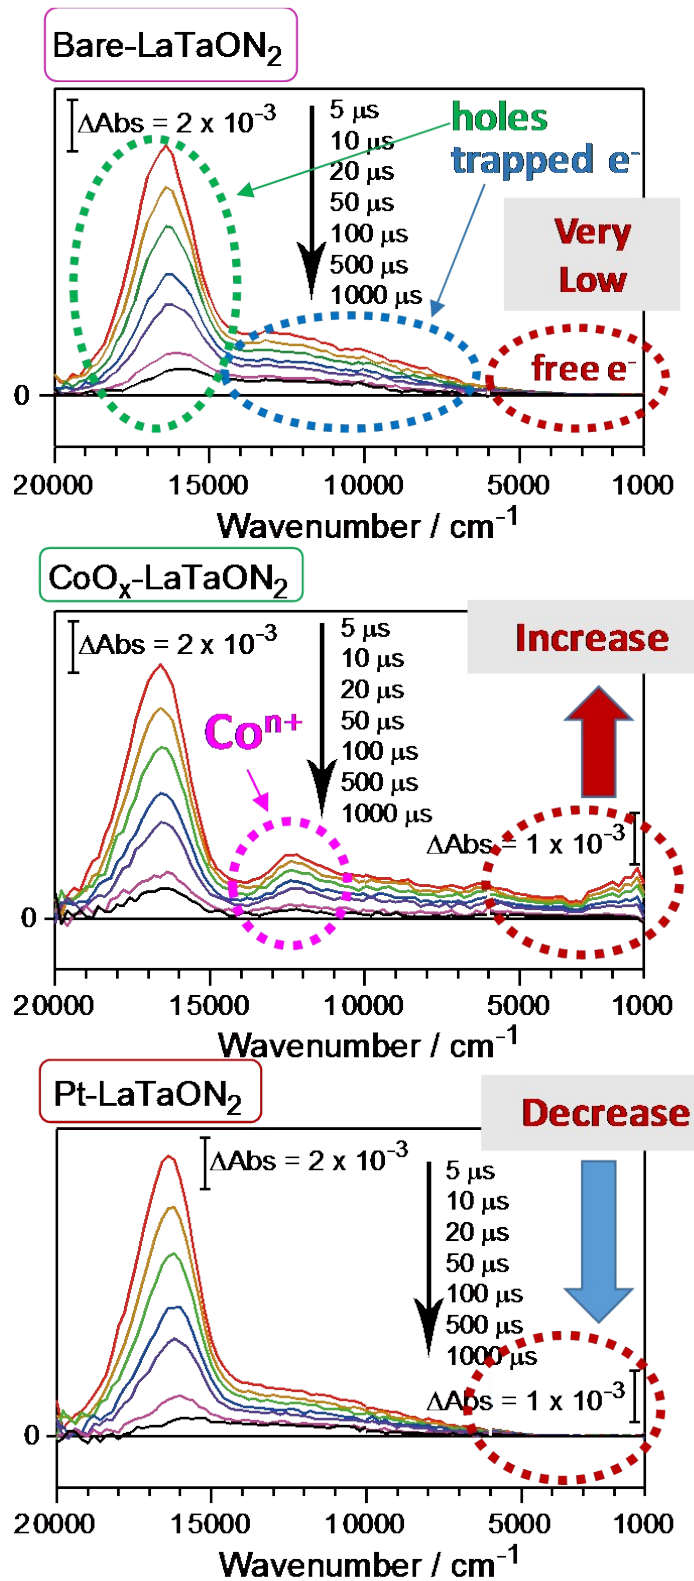

**Figure S1.** Transient absorption spectra of bare, CoO<sub>x</sub>-, and Pt-loaded LaTaON<sub>2</sub>.

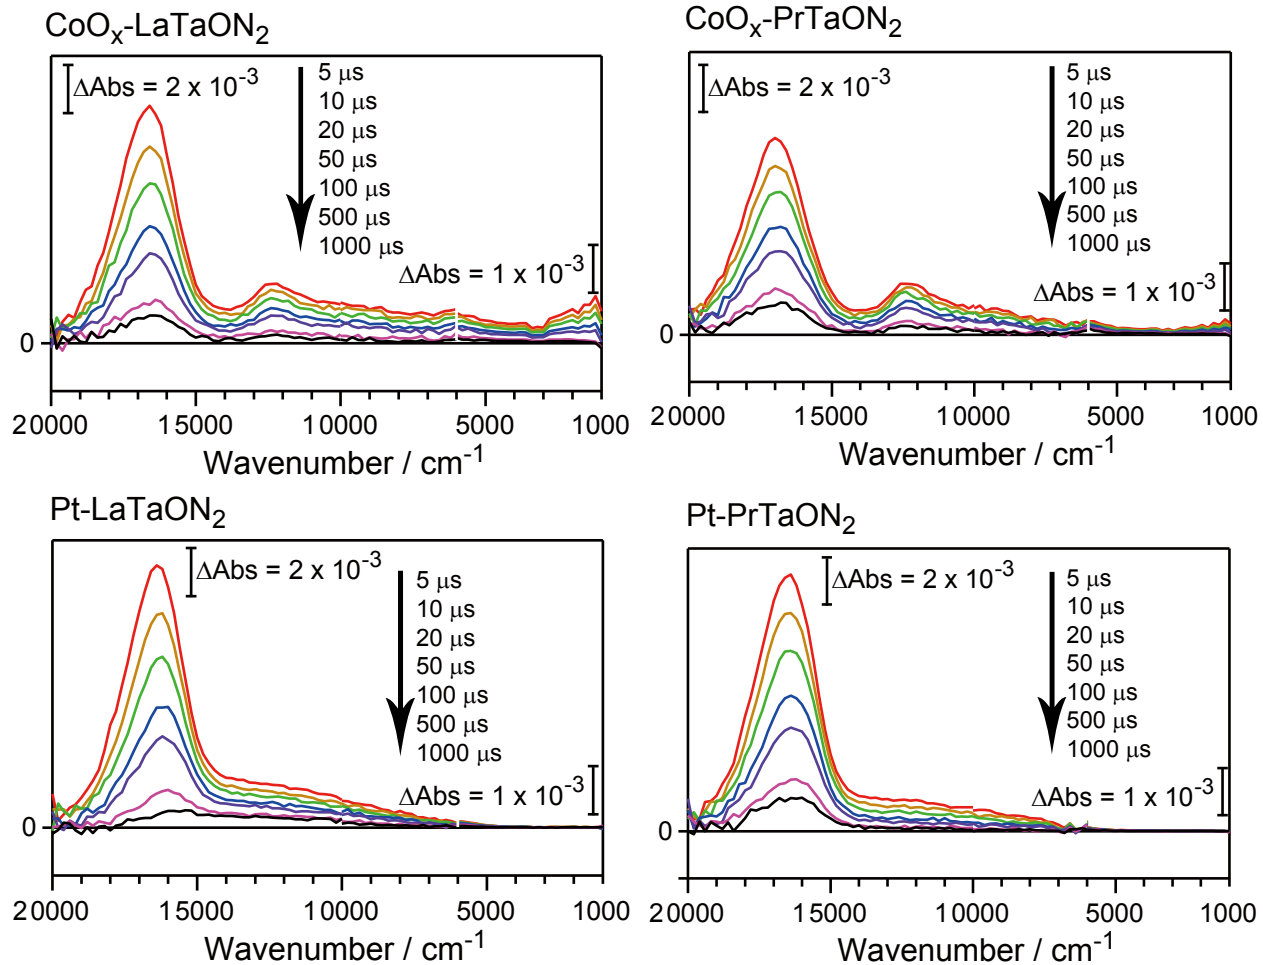

**Figure S2.** Comparison of the transient absorption spectra of  $\text{CoO}_x\text{-}$  and Pt-loaded  $\text{LaTaON}_2$  and  $\text{PrTaON}_2$ .

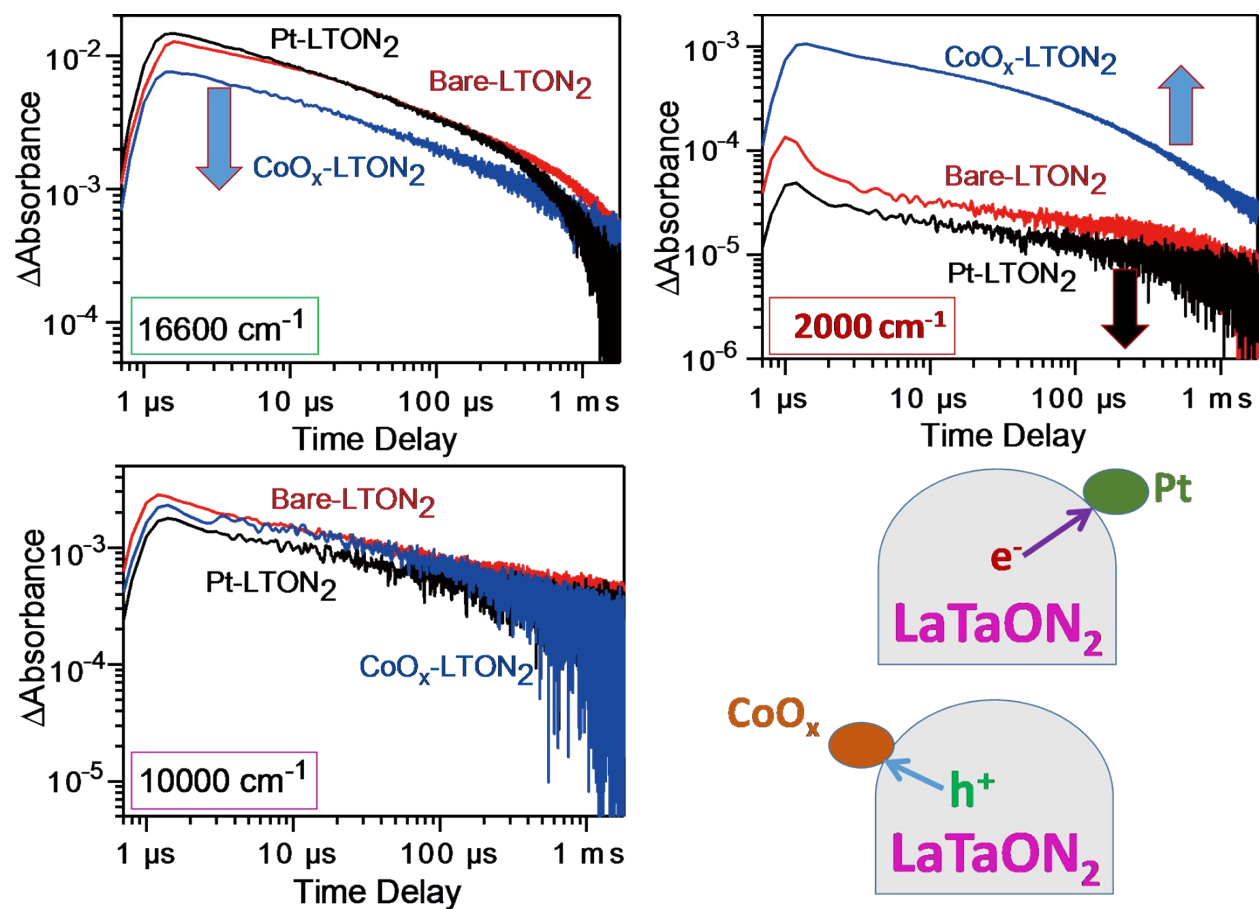

**Figure S3.** Decay kinetics of  $e^-$  and  $h^+$  of bare, CoO<sub>x</sub>-, and Pt-loaded LaTaON<sub>2</sub>.
